# Supplementary material for: Critical Roles for Macrophages in Islet Angiogenesis and Maintenance During Pancreatic Degeneration
Source: Oxford University Press journal article supplement (doi:10.2337/db07-1577), 2008-03-29
Supplement: db071577supplementarytable.xls [file db071577supplementarytable.xls]

## Sheet: Revised version
Call Number	Cluster	Public ID Genbank	Gene Symbol	PBS Mean	PBS SD	Cae Day1 Mean	Cae Day1 SD	Cae Day3 Mean	Cae Day3 SD
1450205_at		NM_023304	---	207.346	134.574	63.4624	35.1271	110.073	47.4147
1418204_s_at	A1	NM_019467	Aif1	241.005	76.8573	1596.25	369.67	2708.62	1176.99
1446095_at		BB365661	Air	92.8943	61.0616	49.5676	51.8919	35.3302	40.8063
1456139_at		BM124989	Air	82.1067	29.9726	115.315	112.584	60.5881	10.8074
1450102_a_at	A1	NM_011787	Amfr	2574.36	382.485	3037.13	590.33	3197.06	724.861
1419549_at	A1	NM_007482	Arg1	31.6824	46.6864	7887.16	2023.77	84.5473	46.3878
1419549_at	A1	NM_007482	Arg1	31.6824	46.6864	7887.16	2023.77	84.5473	46.3878
1459177_at		BG070365	AU015741	558.741	221.232	81.6682	27.1993	91.2659	64.7343
1423586_at	A3	AA500897	Axl	631.688	115.625	1567.86	502.23	4802.07	1107.93
1438621_x_at		BB498381	Axl	60.1317	29.9458	39.6345	20.6489	31.2837	9.34168
1435541_at		AV231340	Btc	731.884	104.343	433.565	40.9061	559.528	23.5352
1417381_at	A1	NM_007572	C1qa	811.558	1044.3	8276.4	1686.78	12992.2	3969.4
1417063_at	A1	NM_009777	C1qb	1164.03	691.404	5905.29	806.054	9984.66	2393.21
1434366_x_at	A1	AW227993	C1qb	1014.1	302.532	2975.95	475.738	4425.34	1906.64
1437726_x_at	A1	BB111335	C1qb	548.514	570.786	5110.16	1146.26	7281.7	3720.81
1448274_at	A1	NM_007573	C1qbp	2336.96	270.715	2778.9	126.12	2710.35	548.342
1449401_at	A1	NM_007574	C1qc	881.124	476.289	7530.62	1173.32	13052.3	2030.15
1421688_a_at		NM_011329	Ccl1	296.811	100.054	83.3302	26.3633	61.1937	22.0041
1417789_at	A3	NM_011330	Ccl11	412.752	120.097	355.175	111.13	615.659	257.949
1419282_at	A1	U50712	Ccl12	23.6593	19.187	895.795	374.86	2268.67	2280.26
1419413_at		NM_011332	Ccl17	299.064	185.364	53.6721	39.1711	133.825	14.0073
1449277_at	B2	NM_011888	Ccl19	326.504	253.857	67.309	26.1343	533.138	244.958
1449277_at	B2	NM_011888	Ccl19	326.504	253.857	67.309	26.1343	533.138	244.958
1420380_at	A1	AF065933	Ccl2	530.781	90.603	2648.49	1369.44	580.442	485.104
1420380_at	A1	AF065933	Ccl2	530.781	90.603	2648.49	1369.44	580.442	485.104
1422029_at		AF099052	Ccl20	102.203	25.6734	229.711	81.5681	106.493	83.1663
1445238_at		BB239244	Ccl21b	378.904	178.824	78.0161	29.5266	177.664	10.7822
1419426_s_at	A1	NM_011335	Ccl21b /// Ccl21a /// Ccl21c	254.075	234.201	629.236	173.729	1102.33	419.548
1417925_at		BC012658	Ccl22	98.1681	71.8943	22.5889	12.9709	153.299	42.9878
1450488_at		AF281075	Ccl24	86.2397	40.1278	282.014	107.044	144.984	157.44
1418777_at		NM_009138	Ccl25	63.0209	47.5351	143.098	29.1804	77.279	11.0625
1458277_at		BB640315	Ccl25	181.161	76.1062	167.502	39.1215	144.888	22.2323
1419188_s_at		NM_011336	Ccl27	298.757	90.5659	294.422	82.9538	479.816	49.0438
1430375_a_at		BE198116	Ccl27	26.5853	8.52546	164.084	72.5519	138.109	148.753
1434962_x_at		BQ174669	Ccl27	230.676	53.6099	208.752	49.2688	306.155	40.6008
1450217_at		BG867337	Ccl28	229.999	131.772	90.0213	23.2614	70.1636	78.7179
1450218_at		BG867337	Ccl28	131.243	41.5989	35.8597	6.62376	45.9296	28.2943
1455577_at		BE196980	Ccl28	423.892	89.0806	195.453	49.8767	292.052	18.0369
1419561_at	A1	NM_011337	Ccl3	24.689	12.1913	152.976	174.266	361.211	319.349
1419561_at	A1	NM_011337	Ccl3	24.689	12.1913	152.976	174.266	361.211	319.349
1421578_at	B1	AF128218	Ccl4	650.977	213.008	354.343	77.9617	591.836	123.82
1421578_at	B1	AF128218	Ccl4	650.977	213.008	354.343	77.9617	591.836	123.82
1418126_at	A3	NM_013653	Ccl5	180.14	69.1303	203.669	43.9523	653.951	157.42
1418126_at	A3	NM_013653	Ccl5	180.14	69.1303	203.669	43.9523	653.951	157.42
1417266_at	A1	BC002073	Ccl6	508.569	437.71	14714.6	698.551	7674.54	546.433
1420249_s_at	A1	AV084904	Ccl6	407.315	419.476	8570.78	562.477	3217.43	211.304
1421228_at	A1	AF128193	Ccl7	366.846	56.9507	887.42	693.003	450.53	319.683
1419684_at	A3	NM_021443	Ccl8	376.395	457.158	5306.98	1163.55	14417.7	4998.4
1417936_at	A1	AF128196	Ccl9	965.241	341.043	13161.7	82.1843	6421.91	2460.23
1448898_at	A1	AF128196	Ccl9	318.683	219.342	9024.31	1116.67	4007.95	1719.76
1419609_at	A1	AV231648	Ccr1	259.241	19.2261	2868.38	379.483	452.955	32.0504
1419610_at		AV231648	Ccr1	42.3327	25.7171	280.158	107.566	46.8745	50.4724
1421420_at		AF215982	Ccr10	37.2635	10.7142	29.2653	17.4803	19.4231	1.57043
1422349_at		NM_007718	Ccr1l1	299.134	113.819	90.31	21.5698	185.498	12.3048
1421186_at	A1	BB148128	Ccr2	149.987	237.337	1755.89	1174.3	729.204	369.069
1421187_at	A1	BB148128	Ccr2	245.01	113.463	2752.33	908.187	1374.53	807.675
1421188_at	A1	BB148128	Ccr2	407.993	177.302	1218.76	109.562	936.724	31.8457
1460067_at	B1	BB324415	Ccr2	655.448	248.498	269.372	102.89	203.143	158.169
1422957_at		NM_009914	Ccr3	97.3611	61.1022	63.7618	29.0177	99.554	18.2501
1421655_a_at		NM_009916	Ccr4	195.966	98.6954	34.4802	20.9491	16.6468	0.103623
1422259_a_at	A1	X94151	Ccr5	162.987	123.444	610.695	20.716	391.528	311.44
1424727_at	A1	D83648	Ccr5	112.765	33.7313	2103.88	621.004	1281.21	346.85
1422260_x_at		X94151	Ccr5	38.6773	49.4528	58.2475	11.9849	75.4707	52.8088
1450357_a_at		NM_009835	Ccr6	238.843	64.5695	133.154	39.8443	160.785	24.6974
1423466_at		BB204380	Ccr7	18.5929	9.86771	14.2997	2.24079	36.4883	32.0618
1422291_at		NM_007720	Ccr8	152.346	114.295	14.6176	12.6109	12.8976	0.064246
1427419_x_at	A1	AJ131357	Ccr9	67.4916	81.4945	315.697	56.1079	740.813	109.155
1421919_a_at		NM_009913	Ccr9	121.083	73.8251	114.714	28.0755	239.624	125.152
1421920_a_at		NM_009913	Ccr9	46.239	64.955	125.733	27.999	351.338	37.4127
1417268_at	A1	NM_009841	Cd14	498.628	122.216	8437.81	1604.62	2007.45	427.804
1417268_at	A1	NM_009841	Cd14	498.628	122.216	8437.81	1604.62	2007.45	427.804
1423166_at	A1	BB534670	Cd36	500.093	260.458	2574.55	830.408	724.208	40.2562
1450883_a_at	A1	BB534670	Cd36	530.913	335.094	3566.29	1247.34	792.386	44.3567
1450884_at		BB534670	Cd36	159.515	58.8615	239.048	133.481	119.7	7.45285
1423166_at	A1	BB534670	Cd36	500.093	260.458	2574.55	830.408	724.208	40.2562
1450883_a_at	A1	BB534670	Cd36	530.913	335.094	3566.29	1247.34	792.386	44.3567
1450884_at		BB534670	Cd36	159.515	58.8615	239.048	133.481	119.7	7.45285
1416330_at	A1	NM_133655	Cd81	3929.9	622.751	6978.58	391.003	7127.21	1474.61
1424495_a_at	A1	AY047360	Cklf	530.553	126.063	1499.79	133.828	1099.64	52.4514
1425860_x_at	A1	AY046597	Cklf	948.886	238.595	1627.54	229.239	1211.62	38.7163
1436242_a_at	A1	BE852312	Cklf	777.737	141.758	1631.27	661.942	739.155	346.387
1451374_x_at	A1	AY047360	Cklf	291.508	107.729	775.031	70.3852	420.464	136.022
1425769_x_at		AF401530	Cklf	304.413	48.2472	340.158	52.0236	292.53	107.894
1455615_at		BE852312	Cklf	755.215	134.53	88.1829	49.652	151.313	31.0503
1456887_at	A1	AW228687	Cmklr1	140.982	109.089	756.479	145.404	1097.35	304.552
1426072_at		U79525	Cmklr1	114.345	102.904	19.4666	8.2208	59.0315	48.8838
1417625_s_at	A3	BC015254	Cmkor1	351.635	124.041	433.482	74.2171	956.549	471.562
1418476_at	B1	NM_018827	Crlf1	3944.7	826.149	851.181	163.772	1881.48	660.989
1448914_a_at	A1	BM233698	Csf1	243.119	161.47	908.225	161.707	632.038	28.2594
1460220_a_at	A1	BM233698	Csf1	864.189	225.223	2037.51	822.425	1441.74	70.7966
1425154_a_at	B1	M21149	Csf1	656.334	248.809	378.599	79.2162	400.331	126.629
1425155_x_at		M21149	Csf1	147.677	122.894	255.707	25.7074	185.98	56.6539
1419872_at	A1	AI323359	Csf1r	3197.2	743.706	9964.68	544.934	14642.9	1063.3
1419873_s_at	A1	AI323359	Csf1r	876.968	481.127	4604.54	615.782	5440.28	2329.37
1423593_a_at	A1	AK004947	Csf1r	1087.36	106.24	2279.89	249.589	3560.62	688.881
1420703_at	A1	BM941868	Csf2ra	79.7512	98.2814	1363.01	67.8194	850.095	183.819
1420704_at		BM941868	Csf2ra /// LOC671366	45.3631	18.1413	85.9482	22.979	21.9468	5.48641
1421326_at	A1	NM_007780	Csf2rb1	31.7978	24.9052	709.932	192.035	608.05	45.029
1455660_at	A1	BB769628	Csf2rb1	349.292	60.698	1374.7	658.981	1354.34	74.6883
1450200_s_at		NM_007780	Csf2rb1 /// Csf2rb2	91.4237	34.0009	363.511	113.853	429.341	196.943
1449360_at	A1	NM_007781	Csf2rb2	270.155	94.1855	980.409	256.606	994.852	76.2771
1418806_at	A1	NM_007782	Csf3r	577.996	172.443	890.982	79.7737	1095.31	345.115
1416953_at	A1	NM_010217	Ctgf	372.787	81.1129	3757.02	727.439	2745.83	643.996
1453996_a_at		AK005389	Cts3	45.5982	37.2179	21.1947	7.30109	26.3738	5.2376
1418689_at		NM_021445	Cts6	55.0409	11.3592	4.45867	0.737151	6.51097	0.110014
1447142_at		AW542037	Cts7	25.2499	20.1052	1.74137	0.616834	12.4007	12.7674
1451933_a_at		AY014779	Cts7	143.287	73.6746	6.44059	2.52106	44.5006	13.0403
1420680_at		NM_019541	Cts8	28.8527	26.4915	9.69682	6.29414	16.5701	19.1407
1446266_at		BB409798	Cts8	284.408	155.318	138.815	46.1608	166.343	53.5222
1417490_at	A1	M14222	Ctsb	10443.3	2281.13	20116.7	1869.2	21605.6	1196.52
1417491_at	A1	M14222	Ctsb	575.393	200.37	2084.67	538.052	2166.75	22.6562
1417492_at	A1	M14222	Ctsb	390.679	323.01	3995.53	438.432	4005.69	496.24
1448732_at	A1	M14222	Ctsb	6327.13	2280.79	18950.2	341.877	18552.1	2187.63
1444987_at		BG067383	Ctsb	151.652	127.684	304.535	269.935	119.64	114.998
1416382_at	A1	NM_009982	Ctsc	5703.52	554.628	12590.9	964.569	11428.4	1664.11
1437939_s_at	A1	BM237633	Ctsc	68.4772	107.02	729.601	107.28	590.197	97.5194
1446834_at		AV367948	Ctsc	152.655	56.4918	225.862	20.8612	174.474	27.018
1448118_a_at	A1	NM_009983	Ctsd	9044.24	1500.36	18232.5	1242.95	13450.7	84.1774
1418989_at	A1	NM_007799	Ctse	1182.93	158.633	5619.84	2102.34	2771.4	66.548
1427797_s_at	A1	BF580235	Ctse /// LOC622147 /// LOC665955 /// LOC666402 /// LOC667328 /// LOC667538 /// LOC668269 /// LOC668639 /// LOC668769 /// LOC668842 /// LOC669176 /// LOC669407 /// LOC669658 /// LOC669821 /// LOC670510 /// LOC671134	212.21	86.4902	800.317	362.846	334.24	59.9793
1451019_at	A3	AK017474	Ctsf	212.276	169.987	128.863	31.8825	512.905	151.534
1449794_x_at		AV370629	Ctsf	899.486	933.521	62.1625	50.2075	213.522	162.104
1419594_at		NM_007800	Ctsg	164.988	153.802	22.9043	26.1428	88.2056	92.0038
1418365_at	A1	NM_007801	Ctsh	711.246	285.395	5136.6	209.155	5105.07	889.958
1443814_x_at	A1	BB542535	Ctsh	644.389	246.737	3522.47	416.48	3432.02	316.112
1416413_at		NM_012007	Ctsj	21.3415	12.485	13.961	13.1071	9.10751	0.740143
1450652_at	A1	NM_007802	Ctsk	210.657	166.619	1046	178.042	2089.25	38.6473
1451310_a_at	A1	J02583	Ctsl	6793.88	3439.12	13475.1	481.311	11780	97.9417
1457724_at		AV023994	Ctsl	130.965	76.763	46.9736	65.1065	51.3592	60.6034
1450175_a_at		NM_022326	Ctsm	67.929	44.1008	11.4009	11.9812	9.43646	9.7646
1433501_at	A1	BG230336	Ctso	730.675	147.204	2070.79	432.889	2819.18	357.96
1443084_at		BB085450	Ctso	231.884	36.4296	128.84	30.2279	131.541	159.395
1422289_a_at		NM_029636	Ctsq	86.6154	63.1084	10.2448	3.50297	19.3859	7.99824
1419142_at		NM_020284	Ctsr	104.636	60.8349	15.5829	13.7772	18.275	7.9911
1448591_at	A1	NM_021281	Ctss	1980.44	2300.93	14917.8	559.353	15173.3	2274.17
1422632_at		NM_009985	Ctsw	163.194	98.9819	90.0472	53.1539	69.6039	38.5863
1417868_a_at	A1	NM_022325	Ctsz	2594.03	983.545	10892.1	920.726	9467.19	1060.27
1417869_s_at	A1	NM_022325	Ctsz	1087.83	458.811	4671.36	1639.26	3401.14	891.684
1417870_x_at	A1	NM_022325	Ctsz	1436.02	315.705	5432.37	570.709	5045.54	952.403
1415803_at		AF010586	Cx3cl1	315.367	98.8648	235.838	16.9799	324.628	9.16527
1415804_at		AF010586	Cx3cl1	89.4624	83.5725	27.6838	9.64099	41.8891	8.22867
1421610_at		NM_021373	Cx3cl1	53.9358	28.6465	15.475	11.9893	33.1553	20.0984
1450019_at	A1	BC012653	Cx3cr1	62.2542	58.8747	221.485	160.012	254.023	284.085
1450020_at	A1	BC012653	Cx3cr1	160.598	99.4251	699.244	457.885	846.131	670.105
1419209_at	A1	NM_008176	Cxcl1	276.48	88.9438	874.443	173.553	318.567	110.378
1441855_x_at	A2	BB554288	Cxcl1	995.214	446.788	1218.9	292.672	870.118	313.485
1457644_s_at	B3	BB554288	Cxcl1	875.672	360.473	943.105	405.441	515.623	176.323
1418930_at	A3	NM_021274	Cxcl10	160.614	101.362	155.981	28.1932	2124.19	2221.76
1418930_at	A3	NM_021274	Cxcl10	160.614	101.362	155.981	28.1932	2124.19	2221.76
1419697_at	A1	NM_019494	Cxcl11	120.555	107.38	1306.37	210.546	511.269	440.83
1419698_at		NM_019494	Cxcl11	198.19	133.304	123.468	14.7154	58.1584	16.3598
1419697_at	A1	NM_019494	Cxcl11	120.555	107.38	1306.37	210.546	511.269	440.83
1419698_at		NM_019494	Cxcl11	198.19	133.304	123.468	14.7154	58.1584	16.3598
1419698_at		NM_019494	Cxcl11	198.19	133.304	123.468	14.7154	58.1584	16.3598
1448823_at	A1	BC006640	Cxcl12	764.647	142.28	2134.39	646.054	2161.69	525.683
1417574_at	A3	NM_013655	Cxcl12	579.579	120.152	330.67	47.0427	1242.77	201.222
1439084_at		BE986839	Cxcl12	309.814	285.749	51.7439	26.8363	206.165	8.17007
1417851_at	A1	AF030636	Cxcl13	274.272	151.64	2545.38	3946.3	287.386	125.553
1448859_at	A1	AF030636	Cxcl13	374.083	231.237	2314.31	3153.15	583.751	12.4302
1418456_a_at	A1	AF252873	Cxcl14	290.589	201.142	750.864	83.5967	409.706	93.2087
1418457_at	A1	AF252873	Cxcl14	22.2064	13.502	1244.63	248.519	203.634	120.665
1421404_at		NM_011339	Cxcl15	165.218	61.7642	80.9996	18.0585	174.466	8.55593
1456428_at		AV022238	Cxcl15	292.865	181.466	29.6658	18.4327	99.5032	76.9704
1418718_at	A1	BC019961	Cxcl16	834.978	181.672	3666.05	881.62	1501.41	323.747
1449195_s_at	A1	BC019961	Cxcl16	135.687	188.568	2604.07	439.567	938.638	303.875
1449984_at		NM_009140	Cxcl2	111.903	30.0434	170.067	47.2651	93.7502	38.2157
1448995_at	A1	NM_019932	Cxcl4	1366.54	729.705	9903.42	1241.05	1378.89	527.569
1419728_at		NM_009141	Cxcl5	69.9611	26.7836	219.494	114.324	193.867	43.9641
1418480_at		NM_023785	Cxcl7	78.057	46.6928	147.611	62.3636	54.5615	30.4428
1418652_at	A3	NM_008599	Cxcl9	38.3765	6.79112	15.733	3.19346	879.043	1031.7
1456907_at		BI104444	Cxcl9	107.165	66.2074	25.759	27.526	106.429	93.1918
1418652_at	A3	NM_008599	Cxcl9	38.3765	6.79112	15.733	3.19346	879.043	1031.7
1456907_at		BI104444	Cxcl9	107.165	66.2074	25.759	27.526	106.429	93.1918
1449925_at	B2	NM_009910	Cxcr3	494.521	157.903	254.301	82.1188	465.648	39.3393
1448710_at	A1	D87747	Cxcr4	124.083	89.8688	1538.39	369.354	1085.11	7.01401
1448710_at	A1	D87747	Cxcr4	124.083	89.8688	1538.39	369.354	1085.11	7.01401
1422812_at		NM_030712	Cxcr6	33.7671	21.0053	14.9096	19.489	88.2933	5.00886
1425832_a_at		AF301018	Cxcr6	79.8393	57.7965	78.0335	10.2235	175.665	47.2065
1432181_s_at	A2	AK013765	Ecgf1	758.446	176.953	1157.47	263.522	608.108	2.23991
1432181_s_at	A2	AK013765	Ecgf1	758.446	176.953	1157.47	263.522	608.108	2.23991
1451924_a_at	A3	D43775	Edn1	124.773	56.3054	194.974	92.6196	456.106	154.673
1433525_at	A1	AW558570	Ednra	33.3344	8.76707	359.318	26.3197	601.136	100.228
1451691_at	A1	BC008277	Ednra	62.1222	43.7307	289.393	120.843	509.754	92.9321
1440093_at		BB238381	Ednra	59.4655	40.7565	19.9623	23.2915	37.0688	38.9049
1460513_a_at		AK017486	Ednra	189.206	170.379	235.48	76.9274	257.561	132.614
1426314_at	A1	BB770914	Ednrb	385.202	61.0504	1188.22	83.0875	424.851	46.2115
1437347_at	A1	BF100813	Ednrb	890.384	436.894	3783.17	140.847	2102.39	62.2807
1423594_a_at	A2	BB451714	Ednrb	502.591	161.26	1146.25	49.8086	367.831	44.9736
1418093_a_at	B1	NM_010113	Egf	4844.39	1929.49	123.443	15.9931	683.93	251.567
1454313_at		AK014017	Egfr	304.242	99.5105	103.686	27.3422	135.264	45.1939
1457563_at		BB409522	Egfr	100.526	83.2286	11.1389	5.70142	33.2564	17.462
1451530_at	B1	U03425	Egfr	509.557	237.769	310.888	8.72979	255.293	16.0534
1432647_at	B1	AK014017	Egfr	693.071	391.137	193.017	68.3833	199.543	1.61612
1435888_at	A1	AV369812	Egfr	414.586	77.0116	1060.63	106.604	776.277	105.719
1424932_at	A1	U03425	Egfr	178.934	96.9501	608.297	51.2722	349.251	3.63903
1460420_a_at	B1	AF277898	Egfr	3629.03	519.332	853.663	173.486	1013.13	131.961
1427682_a_at		X06746	Egr2	13.0481	4.4082	188.172	74.7329	150.836	33.6641
1427683_at		X06746	Egr2	112.919	71.9176	352.857	58.5515	284.625	21.66
1451161_a_at	A1	U66888	Emr1	868.836	292.666	3454.19	670.53	3214.57	990.409
1423344_at	B1	AK010968	Epor	958.169	211.488	247.252	82.8578	406.75	81.6396
1424919_at		BC027080	Erbb2	139.618	68.8937	291.529	53.0208	239.473	2.02673
1434606_at	A1	BF140685	Erbb3	791.117	85.914	1729.42	251.514	960.892	66.7082
1452482_at		BI251855	Erbb3	64.8511	16.3193	47.4899	57.1399	26.1881	10.5203
1446211_at		AW556352	Erbb4	257.211	66.7203	55.5899	28.6103	75.8959	20.0219
1423136_at		AI649186	Fgf1	126.559	33.5214	38.311	2.51095	189.964	44.1731
1441042_at		BE688115	Fgf1	48.533	26.8385	19.0606	3.36815	43.5649	26.5285
1450869_at		AI649186	Fgf1	320.246	93.9011	122.096	22.7615	243.654	31.7588
1420690_at	B1	NM_008002	Fgf10	375.195	116.19	88.5921	75.2072	120.469	70.0134
1421793_at		NM_010198	Fgf11	115.415	79.7002	9.41428	7.19495	23.7241	0.785454
1439959_at		AW488620	Fgf11	48.6166	30.4701	53.5478	11.6172	95.5312	2.74186
1451693_a_at		AF020738	Fgf12	127.109	66.4488	60.4615	17.6196	273.252	58.7509
1440270_at		BQ175704	Fgf12	45.0962	37.6475	6.65695	3.48113	64.036	25.4768
1460137_at		BB344289	Fgf12	57.615	59.3031	13.9844	10.9727	6.21775	0.452403
1418498_at		AF020737	Fgf13	44.321	55.6051	112.046	38.2005	25.7559	9.2732
1418497_at	A1	AF020737	Fgf13	34.5269	14.286	1027.87	312.554	109.972	81.814
1449958_a_at		NM_010201	Fgf14	303.151	73.9558	77.6116	18.6418	63.8667	31.5051
1435747_at		AV141013	Fgf14	13.1492	11.1151	5.31404	4.05028	10.5073	3.77523
1447221_x_at		BB127905	Fgf14	9.14002	4.54374	0.517158	0.348595	3.37242	4.274
1447480_at		BB801162	Fgf14	63.6647	86.0596	8.80235	10.9609	3.63715	0.133952
1458830_at		BB023508	Fgf14	89.6302	40.1978	4.6071	3.45536	24.2827	17.8348
1459073_x_at		BB175009	Fgf14	69.7933	74.0226	43.3272	47.2202	19.379	14.519
1418376_at		NM_008003	Fgf15	47.2107	16.7918	20.1562	10.7701	26.5673	30.7607
1420806_at		NM_030614	Fgf16	70.831	27.0074	40.0535	10.8284	84.5621	4.85236
1421523_at		NM_008004	Fgf17	192.369	77.9504	62.1548	15.0279	59.7742	7.16866
1456239_at		BB801085	Fgf17	95.3363	64.7848	8.45302	6.6767	29.8859	11.3798
1449545_at		NM_008005	Fgf18	138.28	93.9428	120.107	28.2818	192.911	65.8446
1449826_a_at		NM_008006	Fgf2	24.5644	21.0896	89.1294	13.2798	26.7546	13.4716
1421677_at		NM_030610	Fgf20	25.4994	3.88227	4.67024	0.713771	14.0327	10.3764
1422916_at	B1	NM_020013	Fgf21	1456.05	654.254	178.993	26.0368	130.111	49.1034
1460296_a_at		NM_023304	Fgf22	256.275	125.423	26.9238	10.5485	55.3271	39.8704
1422176_at		AF263536	Fgf23	121.409	57.1693	48.1039	6.94778	64.2699	20.5221
1422923_at		NM_008007	Fgf3	194.972	106.581	27.6655	16.3157	43.2902	42.2041
1441914_x_at		BB391920	Fgf3	344.262	116.061	69.2013	45.9957	58.5553	45.9218
1420085_at		BB709552	Fgf4	862.711	142.727	12.8511	12.8784	41.8064	52.7194
1420086_x_at		BB709552	Fgf4	525.09	315.088	21.3197	8.25656	45.2448	33.9738
1449729_at		BB709552	Fgf4	10.0282	6.32362	3.07356	1.85211	2.04977	0.21071
1450282_at		NM_010202	Fgf4	188.149	130.176	160.096	50.8378	74.2749	45.3235
1438883_at		AV240088	Fgf5	28.1698	9.23363	5.75964	2.72971	12.4397	0.243677
1426186_a_at		AB016516	Fgf5	25.3899	9.8389	11.2103	2.65755	15.4032	7.65293
1427582_at		M92416	Fgf6	157.645	134.872	11.7688	4.67153	40.632	35.8757
1422243_at		NM_008008	Fgf7	336.953	28.2344	210.697	60.214	313.09	143.969
1438405_at		BB791906	Fgf7	169.514	60.4127	231.751	63.1196	396.169	15.1986
1451882_a_at		U18673	Fgf8	26.7035	33.8435	4.48793	2.95267	4.00416	2.64127
1420795_at		NM_013518	Fgf9	286.827	133.009	138.058	29.391	128.879	0.394835
1438718_at		AW046863	Fgf9	69.9451	55.3805	139.787	34.8397	177.019	24.2469
1445258_at		BB051628	Fgf9	10.7654	1.68829	4.60795	0.953236	3.64296	0.584721
1419086_at		U49641	Fgfbp1	234.672	60.0647	57.0128	24.1606	83.2828	13.8339
1425911_a_at	A1	M65053	Fgfr1	679.827	111.156	1106.89	92.7048	1179.4	46.1664
1436551_at		AW494469	Fgfr1	246.965	47.3241	187.817	56.9275	273.087	136.438
1424050_s_at	A3	M33760	Fgfr1	1137.09	532.856	1369.12	103.927	1882.21	251.017
1428919_at	B1	BB667817	Fgfr1op	922.764	107.116	480.419	71.3728	539.851	27.4784
1431020_a_at	A1	AK008983	Fgfr1op2	715.161	78.2858	1293.5	14.6086	853.249	156.85
1423591_at	A1	AK004662	Fgfr1op2	1832.85	131.25	2034	203.957	2147.46	608.94
1441460_at		BB435465	Fgfr1op2	164.69	114.508	128.18	12.2039	186.77	83.3051
1420847_a_at	A3	NM_010207	Fgfr2	365.737	124.393	287.182	91.1345	928.944	167.854
1433489_s_at	B1	BG873440	Fgfr2	2308.28	809.712	557.473	196.67	1033.44	69.1713
1443996_at		BB220625	Fgfr2	368.722	180.432	61.084	39.4144	105.079	74.6584
1425796_a_at		AF024638	Fgfr3	208.82	137.95	89.5385	16.6256	268.893	0.752121
1421841_at	A3	NM_008010	Fgfr3	498.81	99.4699	228.789	44.3086	1217.59	346.517
1427776_a_at		AF127141	Fgfr4	118.346	78.1856	51.6352	12.8206	90.5693	52.6824
1427777_x_at		AF127141	Fgfr4	542.92	122.373	168.755	100.724	277.155	35.6329
1427845_at		AF127140	Fgfr4	32.8781	14.9384	6.3731	3.97268	32.1164	13.169
1427846_x_at	B1	AF127140	Fgfr4	619.884	145.117	214.823	50.6686	371.665	42.8021
1451912_a_at		AF321301	Fgfrl1	817.528	53.4059	755.746	256.678	734.285	82.4244
1447878_s_at	B1	BB109694	Fgfrl1	2542.08	445.663	2042.61	518.776	1897.94	121.455
1451756_at		D88690	Flt1	556.941	176.744	108.843	47.5076	269.283	144.028
1417859_at		NM_008088	Gas7	48.5123	53.6245	242.468	52.0259	210.138	119.424
1431400_a_at		AK017394	Gas7	30.68	5.47105	95.7287	47.1504	117.24	83.9712
1445685_at		AI837851	Gas7	54.4112	28.2835	72.7058	49.5295	29.4724	13.3495
1424007_at	A3	L42114	Gdf10	539.759	237.65	325.01	166.993	2040.61	323.897
1421973_at		BE534815	Gfra1	42.4597	18.3066	12.1317	9.15211	32.269	5.87945
1450440_at		BE534815	Gfra1	62.7349	68.9093	62.7712	9.1399	73.5665	20.5512
1439015_at	B1	AV221299	Gfra1	552.39	106.85	171.413	40.363	347.184	58.0405
1425578_a_at		BI134771	Gfra2	205.195	15.9699	35.1022	21.9204	50.4602	53.6481
1433716_x_at		BB284482	Gfra2	17.2924	9.26481	42.1124	22.8297	109.986	47.6833
1459847_x_at		AV354240	Gfra2	154.645	23.4756	56.2313	19.0043	120.363	0.0870348
1423007_a_at	B1	NM_008115	Gfra2	411.387	162.147	96.9162	28.3883	181.082	47.0252
1425579_at	B1	BI134771	Gfra2	550.766	145.598	252.167	18.402	294.867	92.7569
1418880_at		NM_010280	Gfra3	734.036	230.944	166.056	57.3831	353.216	108.747
1450835_a_at	B1	NM_020014	Gfra4	805.656	259.608	199.343	77.5256	281.479	16.1039
1420394_s_at	A1	U05264	Gp49a /// Lilrb4	356.822	330.826	5014.43	1922.85	1970.43	693.813
1418350_at		L07264	Hbegf	247.58	109.408	474.115	85.282	360.803	167.948
1438912_at	B1	AW322533	Hdgfrp2	731.506	525.126	168.939	110.744	308.357	108.594
1424443_at	A1	AV378394	Hdgfrp3 /// Tm6sf1	103.394	121.502	1625.52	320.152	1004.15	148.036
1451866_a_at		AF042856	Hgf	116.286	56.4047	181.082	55.3229	80.3849	27.8295
1427418_a_at	A1	X95580	Hif1a	2205.72	1086.19	4696.06	1604.16	2647.71	123.371
1448183_a_at	A1	BB269715	Hif1a	105.241	83.1819	869.999	115.97	447.385	153.604
1431981_at		AK017853	Hif1a	225.053	168.161	41.2451	24.6476	48.8693	22.9542
1457231_at		BB409314	Hif1a	21.2123	18.1448	11.8981	12.7175	2.53898	0.31575
1455481_at	B2	BM241722	Ids	2554.01	266.061	1879.85	262.394	2863.52	327.063
1449025_at	A3	NM_010501	Ifit3	88.9957	82.174	125.561	109.755	5869.21	5326.49
1436497_at		BI793666	Igf1	21.9415	5.33418	4.32753	3.89748	2.96619	0.891754
1419519_at	A1	NM_010512	Igf1	800.695	146.651	2010.24	572.971	2350.2	623.85
1452014_a_at	A1	AF440694	Igf1	3225.19	447.399	4147.84	686.488	4088.73	353.237
1437219_at	B1	AW553541	Igf1r	460.347	267.866	308.781	253.136	169.357	59.8058
1452982_at	B1	BB446952	Igf1r	3045.93	237.607	1331.26	149.869	1417.9	68.5568
1428967_at		BB446952	Igf1r	263.936	152.974	220.218	70.6567	197.802	96.1153
1443566_at		BM205229	Igf1r	127.164	138.969	82.4001	44.0775	42.6987	34.0139
1445600_at		BM219178	Igf1r	239.37	81.086	96.7636	94.5787	83.3631	44.028
1445664_at		BM123510	Igf1r	76.9246	54.0204	14.2587	9.08738	33.9852	16.8369
1446303_at		AV374369	Igf1r	269.203	100.816	148.926	68.1213	122.168	3.80523
1452108_at		BE980124	Igf1r	112.093	100.592	101.53	10.6686	69.2903	63.6621
1426565_at	B1	BE980124	Igf1r	793.922	84.5759	452.318	27.2394	341.712	75.4938
1448152_at		NM_010514	Igf2	61.1485	26.2765	150.357	31.9654	362.728	41.2458
1415931_at		NM_010514	Igf2	73.4674	16.5662	28.991	11.6269	49.4189	37.1622
1427394_at		AB030734	Igf2as	498.558	142.281	137.696	92.7192	174.955	119.393
1433731_at	B1	BG092043	Igf2bp3	1912.75	709.932	793.107	471.177	955.323	684.261
1424111_at	A2	BG092290	Igf2r	808.218	231.692	978.204	322.471	589.787	72.9672
1440979_at		BE994321	Igf2r	22.8047	14.0506	39.8672	38.1832	31.9067	30.0449
1445966_at		BG075586	Igf2r	252.457	82.2788	221.238	213.586	177.71	52.2094
1457356_at		BI793602	Igf2r	248.212	113.836	209.735	130.018	196.98	13.5578
1424112_at	A2	BG092290	Igf2r	1069.1	258.065	1222.37	443.942	842.574	198.491
1450330_at		NM_010548	Il10	183.779	81.1719	83.5457	6.66681	214.095	162.706
1450330_at		NM_010548	Il10	183.779	81.1719	83.5457	6.66681	214.095	162.706
1448731_at	A1	NM_008348	Il10ra	36.012	7.21291	265.205	72.3814	557.106	174.468
1437808_x_at		BB225239	Il10ra	50.331	13.8654	8.8818	3.67477	89.7834	88.5624
1456173_at		BB225239	Il10ra	16.0206	3.92899	4.59505	1.25016	5.12607	0.868482
1419455_at	A1	NM_008349	Il10rb	2010.29	264.339	4127.28	386.794	3918.45	621.758
1449982_at		NM_008350	Il11	129.06	60.1592	61.4093	4.56849	63.2091	3.54932
1417505_s_at	B2	BC004619	Il11ra1 /// Il11ra2 /// LOC621887	2131.48	211.864	1757.47	349.168	2445.55	124.819
1459868_x_at		AV313111	Il11ra1 /// Il11ra2 /// LOC621887	323	104.105	140.567	28.4352	197.393	0.208781
1417505_s_at	B2	BC004619	Il11ra1 /// Il11ra2 /// LOC621887	2131.48	211.864	1757.47	349.168	2445.55	124.819
1459868_x_at		AV313111	Il11ra1 /// Il11ra2 /// LOC621887	323	104.105	140.567	28.4352	197.393	0.208781
1425454_a_at		AF128210	Il12a	187.07	65.5806	61.8901	2.87062	78.4461	5.98391
1425454_a_at		AF128210	Il12a	187.07	65.5806	61.8901	2.87062	78.4461	5.98391
1419530_at		AF128214	Il12b	195.909	118.036	73.6546	16.4367	104.804	30.4565
1449497_at		AF128214	Il12b	88.2911	23.6884	22.5319	16.4195	44.3301	16.5362
1419530_at		AF128214	Il12b	195.909	118.036	73.6546	16.4367	104.804	30.4565
1449497_at		AF128214	Il12b	88.2911	23.6884	22.5319	16.4195	44.3301	16.5362
1418166_at		NM_008353	Il12rb1	271.421	146.249	107.425	53.7994	144.36	4.70755
1421623_at		NM_008354	Il12rb2	258.407	127.789	99.0665	11.7908	171.848	22.9833
1420802_at		NM_008355	Il13	68.2167	34.5743	12.9275	3.66948	14.7517	2.53643
1427164_at	A1	BB730912	Il13ra1	333.934	35.5487	821.502	87.9648	650.728	42.0413
1427165_at	A1	BB730912	Il13ra1	322.998	209.204	1063.27	251.573	1495.26	167.297
1451775_s_at	A1	S80963	Il13ra1	432.609	196.848	1224.09	311.174	991.364	124.751
1454783_at	A1	BI081033	Il13ra1	242.616	133.615	999.848	51.5721	896.23	203.877
1425625_at		S80963	Il13ra1	479.611	263.802	228.38	10.7553	198.69	123.968
1422177_at		BC003723	Il13ra2	286.82	102.709	109.856	2.64827	81.237	3.11754
1418219_at	A3	NM_008357	Il15	121.458	92.6908	236.085	51.4367	742.481	336.664
1448681_at		NM_133836	Il15ra	209.033	152.786	304.157	29.8826	381.789	40.4782
1422397_a_at	B1	NM_008358	Il15ra	727.297	81.3738	282.714	91.4126	370.328	104.596
1417391_a_at	A3	BC026894	Il16	386.639	311.692	481.177	83.7977	1075.29	171.844
1443796_at		BB206877	Il16	325.441	64.4984	76.7447	32.1223	179.397	0.377594
1447814_x_at		BB480773	Il16	219.666	45.2417	46.8896	27.1846	94.1782	7.50666
1448686_at		BC026894	Il16	146.756	70.0319	123.916	31.1254	181.333	21.0303
1421672_at	B1	NM_010552	Il17a	453.927	99.1175	140.052	17.3151	287.402	5.65337
1431693_a_at		AK003506	Il17b	230.174	217.56	8.18964	2.2846	34.007	34.5914
1435714_x_at	B2	BB809808	Il17d	229.749	111.758	87.7486	19.2313	421.607	197.851
1445988_at		BG064506	Il17d	364.493	203.853	182.511	70.0849	292.256	25.2194
1456612_at		AI462269	Il17d	14.1238	4.99469	5.77601	3.45926	8.1267	1.51322
1420904_at	A1	AK010040	Il17ra	92.4734	32.7505	499.887	94.1867	268.52	36.1929
1420905_at		AK010040	Il17ra	433.007	56.7049	738.408	14.7468	527.914	10.2034
1420678_a_at		NM_019583	Il17rb	386.08	129.128	168.009	26.1584	218.756	16.4506
1419671_a_at		NM_134159	Il17rc	338.609	200.473	428.724	108.642	378.926	143.231
1457471_at		BB075652	Il17rc	44.2212	52.031	29.3956	14.6589	31.3477	20.9752
1452471_at		AF459444	Il17rd	297.589	105.782	150.554	54.2773	155.343	19.3087
1459097_at		BG069183	Il17rd	42.5806	7.86076	11.0699	2.74939	15.7996	8.55315
1426566_s_at	A3	BG973910	Il17re	350.277	296.846	279.803	74.9453	652.012	37.6097
1439357_at		BB291414	Il17re	355.76	122.723	106.154	24.6193	120.999	9.69445
1452109_at		BG973910	Il17re	470.574	307.031	492.985	126.866	719.878	185.079
1417932_at	A1	NM_008360	Il18	393.034	111.871	854.968	60.1114	1200.02	386.864
1450424_a_at	A3	AF110803	Il18bp	158.083	93.5383	239.994	23.8517	672.24	536.28
1421628_at		NM_008365	Il18r1	88.0509	61.2313	126.226	16.4429	168.039	46.7538
1421291_at		NM_010553	Il18rap	164.052	93.9272	170.131	36.8406	151.496	75.1252
1456545_at		AV247387	Il18rap	56.6133	21.3565	195.744	51.9376	55.3131	34.1478
1421473_at		BC003727	Il1a	26.6969	3.34359	19.0236	2.13704	57.07	21.162
1449399_a_at		BC011437	Il1b	430.694	97.2967	196.817	36.7573	244.877	4.76641
1451957_at		AY071844	Il1f10	132.589	42.8397	93.9411	57.258	100.574	1.74237
1421370_a_at		NM_019451	Il1f5	247.058	110.84	124.365	10.366	103.467	50.9833
1426507_at		AV232344	Il1f5	382.508	77.8098	152.195	34.4215	215.509	23.558
1418609_at	B1	AF206697	Il1f6	582.634	270.891	253.594	47.2142	241.307	112.85
1425715_at		AY071842	Il1f8	333.542	143.553	229.571	44.8152	235.391	67.7168
1425958_at		AY071843	Il1f9	311.17	46.3657	132.23	25.3294	140.443	0.0941374
1448950_at	A1	NM_008362	Il1r1	137.362	68.8603	832.396	90.362	863.287	289.015
1459777_at		BB042417	Il1r1	20.1479	15.0587	4.10807	5.51885	1.6588	1.0606
1419532_at		NM_010555	Il1r2	179.789	138.266	277.141	17.231	116.838	2.66823
1457108_at		BM240069	Il1r2	96.8654	14.3339	44.5365	18.0863	147.622	67.4486
1421843_at	B1	BE285634	Il1rap	872.071	286.336	257.97	84.0011	245.319	30.0231
1439697_at		AV348583	Il1rap	162.848	147.851	21.5789	10.3116	87.6526	55.0013
1442614_at		BE945253	Il1rap	151.492	107.508	24.9802	12.7009	78.9635	89.8791
1449585_at		NM_134103	Il1rap	61.1647	31.8715	118.838	41.59	61.33	10.917
1445821_at		BG069020	Il1rapl1	146.462	44.2515	37.8061	8.391	58.4867	0.120486
1458964_at		AW122554	Il1rapl1	188.061	98.6045	48.5174	21.1053	85.3724	9.33919
1420462_at		NM_030688	Il1rapl2	37.7714	13.7184	6.56475	3.00377	11.5335	5.18256
1427645_a_at		AJ277831	Il1rapl2	96.6093	55.2484	5.1305	2.88177	18.5691	16.4348
1441168_at		BG071836	Il1rapl2	82.6821	40.8783	31.7225	4.52157	25.6641	2.76505
1446520_at		BB182967	Il1rapl2	15.5245	9.60892	5.60576	0.809933	7.00184	3.68651
1446875_at		BG072329	Il1rapl2	245.751	48.9565	73.0845	32.3651	159.3	12.173
1422317_a_at		NM_010743	Il1rl1	55.2711	61.3707	31.2844	22.5795	45.1297	34.2733
1425145_at		D13695	Il1rl1	74.2492	27.5382	135.25	20.7438	215.782	29.6296
1434903_s_at		BG073776	Il1rl2	331.642	66.5297	495.318	37.6136	514.328	56.4332
1450273_at		NM_133193	Il1rl2	54.4053	13.0524	53.1273	36.5949	28.7516	2.43515
1423017_a_at	A1	NM_031167	Il1rn	79.3474	22.1444	1197.86	241.961	528.605	117.537
1425663_at	A1	M57525	Il1rn	286.818	122.354	844.801	293.527	329.003	10.9383
1451798_at	A1	M57525	Il1rn	336.163	78.5656	1579.78	218.598	533.604	55.046
1449990_at		AF065914	Il2 /// LOC630222	290.61	81.2979	24.4209	23.0971	31.1369	20.1129
1421608_at		NM_021380	Il20	1070.74	389.426	271.042	45.7292	325.401	18.6031
1446498_at		BB551879	Il20ra	152.857	49.1476	31.5224	10.013	46.2496	41.6585
1450334_at		NM_021782	Il21	100.726	68.2227	7.19364	2.53537	42.6464	17.1677
1450456_at		AB049137	Il21r	55.5109	41.2953	284.974	100.052	195.266	92.9935
1427624_s_at		AJ249492	Il22 /// Iltifb	32.4028	21.3694	9.56955	5.76414	12.6973	9.33339
1437665_at		BB212617	Il22ra2	198.057	118.746	117.743	48.1817	150.886	48.4122
1419529_at		NM_031252	Il23a	72.6545	47.4342	159.947	40.6625	90.5584	15.904
1426181_a_at	B1	AF333251	Il24	605.034	167.131	127.669	27.5472	193.08	1.486
1420740_at		NM_080729	Il25	115.589	110.859	6.48549	6.44763	9.19105	3.68022
1449508_at		NM_016671	Il27ra	84.6632	13.1208	153.626	81.7096	72.2796	8.19436
1446908_at		AU042637	Il28ra	47.0048	50.2504	35.7354	29.1084	55.2079	4.3717
1460598_at		AW212870	Il28ra	340.523	59.5103	154.591	34.8996	203.72	15.6901
1420691_at		AF054581	Il2ra	87.6789	76.6024	54.3385	7.22777	77.4428	8.90147
1420692_at		AF054581	Il2ra	58.2256	55.0271	33.3527	3.90078	67.4365	3.94307
1417546_at		M28052	Il2rb	151.595	103.912	95.7477	17.8993	202.164	77.733
1448759_at		M28052	Il2rb	106.72	96.6923	15.4574	4.4999	175.894	19.3854
1459870_x_at		BB243653	Il2rb	73.718	50.3347	91.8219	76.3507	42.9933	47.2244
1416295_a_at	A1	L20048	Il2rg	171.04	101.122	1225.58	385.43	1425.52	604.196
1416296_at	A1	L20048	Il2rg	348.703	342.662	838.386	190.953	1057.99	188.351
1450566_at		NM_010556	Il3	31.0272	23.4209	4.90808	3.49166	7.93759	4.97885
1430001_at		AK005939	Il31	6.19898	2.63407	1.20956	0.0537563	1.78284	0.454868
1445095_at		BG067162	Il31ra	12.2746	4.69749	2.92378	1.12942	5.33194	2.10379
1451535_at		AB083111	Il31ra	68.0256	70.8884	11.6423	5.34054	17.6212	2.60611
1419712_at		NM_008369	Il3ra	27.189	9.71053	177.826	5.11041	307.436	85.7323
1449864_at		NM_021283	Il4	269.034	75.1091	82.6005	14.7638	106.882	5.96753
1419192_at		NM_010215	Il4i1	58.5885	36.3798	31.1738	19.554	78.041	7.03428
1421034_a_at	A1	NM_010557	Il4ra	95.4152	73.2808	1491.58	480.571	585.202	37.459
1423996_a_at	A1	AF000304	Il4ra	107.473	23.3325	1422.96	240.496	560.852	264.24
1447858_x_at		AV252273	Il4ra	285.77	72.7208	99.0326	26.077	136.77	40.7959
1450550_at		NM_010558	Il5	182.113	39.6818	11.9581	7.91796	41.0851	41.1228
1421620_at		NM_008370	Il5ra	63.814	32.0932	58.079	38.6081	51.3617	57.1582
1450297_at		NM_031168	Il6	34.0613	19.2144	205.931	109.415	71.8715	14.3886
1450297_at		NM_031168	Il6	34.0613	19.2144	205.931	109.415	71.8715	14.3886
1452416_at	B1	X53802	Il6ra	908.241	153.802	328.6	162.139	613.827	391.887
1422270_a_at		NM_010559	Il6ra	370.276	105.711	265.968	24.581	389.079	77.0915
1421239_at	A1	AA717838	Il6st	199.037	83.8669	654.107	368.568	698.476	416.608
1437303_at	A1	BI102913	Il6st	2211.79	344.722	2972.86	578.312	2926.2	679.881
1452843_at	A1	AK017211	Il6st	811.585	156.185	2107.19	479.009	2353.84	377.135
1460295_s_at	A1	AA717838	Il6st	483.991	269.79	1092.69	301.021	1231.18	606.342
1421239_at	A1	AA717838	Il6st	199.037	83.8669	654.107	368.568	698.476	416.608
1437303_at	A1	BI102913	Il6st	2211.79	344.722	2972.86	578.312	2926.2	679.881
1452843_at	A1	AK017211	Il6st	811.585	156.185	2107.19	479.009	2353.84	377.135
1460295_s_at	A1	AA717838	Il6st	483.991	269.79	1092.69	301.021	1231.18	606.342
1422080_at		NM_008371	Il7	17.433	10.0917	15.3897	8.56974	23.5307	22.784
1436861_at		BG069762	Il7	104.431	73.9497	76.648	26.2166	125.391	20.9971
1448575_at		AI573431	Il7r	476.175	174.154	507.88	174.747	390.23	56.9924
1448576_at		AI573431	Il7r	73.9923	17.2372	184.505	82.9525	157.969	22.3571
1450565_at	B1	NM_008373	Il9	410.641	266.859	64.4179	15.344	101.329	25.0271
1421570_at		NM_008374	Il9r	58.2231	14.1291	9.49627	3.22312	17.2076	8.91729
1433633_at	A3	BB183385	Irf2bp2 /// LOC672960	738.255	157.609	738.902	186.723	1406.44	6.23812
1433634_at	A3	BB183385	Irf2bp2 /// LOC672960	3350.55	812.412	3678.66	571.056	6137.99	643.894
1417244_a_at	A3	NM_016850	Irf7	120.773	53.6064	411.936	159.382	6853.78	4431.3
1416714_at	A3	BG069095	Irf8	438.059	62.5992	1673.63	150.911	3982.64	665.667
1449379_at	B1	NM_010612	Kdr	945.476	155.369	507.924	111.238	889.06	20.1626
1452514_a_at	A2	X65997	Kit	486.558	147.962	1212.44	326.966	263.113	73.314
1415855_at	A1	BB815530	Kitl	589.368	102.922	888.102	117.579	1241.77	44.7282
1425107_a_at	B1	D17444	Lifr	3542.65	886.241	393.622	20.5082	505.665	184.762
1450207_at		NM_013584	Lifr	237.773	111.353	64.4235	45.4466	58.9581	38.1851
1424302_at	A1	U96693	Lilrb3 /// LOC619608	162.586	189.59	1954.38	396.513	1533.93	954.306
1437014_x_at	A1	AV123870	LOC545161 /// LOC637273	1156.52	385.675	1972.19	681.186	1518.72	300.764
1417185_at	A1	BC002070	Ly6a	3420.19	653.713	12414	778.409	15519.5	2860.53
1439773_at	A3	BI408205	Ly6e	622.882	140.541	708.239	184.321	1280.9	613.725
1453304_s_at	B1	BM245572	Ly6e	22135	3481.4	13167.6	930.112	18347.9	1841.99
1435828_at	A1	BM240693	Maf	223.674	72.0188	803.429	195.87	797.296	37.4876
1437473_at	A1	AV284857	Maf	95.598	90.8304	1094.8	398.79	2076.36	1049.05
1447849_s_at	A1	AV323441	Maf	266.978	95.0495	1292.91	205.301	1537.45	234.244
1456060_at	A1	AV284857	Maf	679.759	558.385	4361.1	932.123	6117.44	1593.8
1444073_at		AV352375	Maf	140.644	112.752	134.061	45.9672	191.36	66.8878
1447945_at		BI466869	Maf	147.65	76.7978	132.896	28.109	127.829	112.484
1420046_s_at	A1	AU042856	Maf1	1589.36	189.185	2407.05	424.862	2337.13	44.7629
1451126_at	A1	BC016260	Maf1	2256.89	471.445	2296	517.939	2344.98	378.313
1451715_at	A1	AW412521	Mafb	53.36	37.819	458.439	86.487	317.222	39.7828
1451716_at	A1	AW412521	Mafb	280.014	98.0268	1860.94	345.865	1963.75	283.725
1418936_at	A1	BC022952	Maff	37.9143	14.8569	341.039	133.687	96.2165	34.1041
1434054_at	A1	BB342453	Mafg	62.2436	15.1194	588.132	65.4604	441.807	197.803
1448916_at	A1	BC002092	Mafg	314.967	129.446	1053.55	31.0078	728.944	220.505
1418616_at	B1	NM_010757	Mafk	746.426	236.98	432.428	124.346	504.481	26.8538
1449498_at	A2	NM_010766	Marco	75.8199	61.0949	264.368	280.878	17.6344	8.21574
1458297_s_at	A2	AI323439	Marco	103.498	162.731	270.584	337.393	16.4747	9.17448
1422990_at		NM_008591	Met	35.2119	16.7973	325.941	83.2074	238.428	54.2943
1419605_at	A3	NM_010796	Mgl1	807.063	152.132	2787.58	589.363	6753.08	2147.38
1416335_at	A1	NM_010798	Mif	5033.09	976.329	8308.97	1189.78	7975.86	1169.8
1433109_at		AK015344	Mif	114.828	68.5236	21.6942	11.3558	11.5588	1.80748
1454481_at		AK015344	Mif	459.579	128.214	37.5501	31.7695	71.3186	18.996
1423488_at	A1	BC021914	Mmd	291.369	102.156	784.489	71.2026	627.163	78.5164
1423489_at	A1	BC021914	Mmd	173.918	139.381	681.994	31.6202	443.084	117.538
1423488_at	A1	BC021914	Mmd	291.369	102.156	784.489	71.2026	627.163	78.5164
1423489_at	A1	BC021914	Mmd	173.918	139.381	681.994	31.6202	443.084	117.538
1420450_at		NM_019471	Mmp10	68.0354	22.2144	40.4384	23.1344	26.3402	10.3152
1417234_at	A1	NM_008606	Mmp11	73.6151	90.2533	273.277	117.142	361.786	188.892
1449153_at		BC019135	Mmp12	20.3836	14.9072	49.9224	18.3168	23.5763	20.8925
1417256_at		NM_008607	Mmp13	18.0547	12.3703	23.437	19.8409	49.7998	51.7421
1448383_at	A1	NM_008608	Mmp14	483.459	97.3397	2769.22	477.662	4609.39	387.791
1416572_at	A1	NM_008608	Mmp14	56.7327	51.8301	1338.09	533.04	2192.54	747.206
1437462_x_at	A2	BB484002	Mmp15	512.694	402.185	790.341	257.438	326.237	50.215
1422597_at	A1	NM_008609	Mmp15	41.7259	11.769	854.689	345.353	119.336	67.7225
1439734_at	A2	BB767109	Mmp15	735.13	112.31	889.619	360.533	533.4	73.4101
1422626_at	B1	AF282844	Mmp16	418.673	124.786	142.218	25.5311	188.957	69.1604
1437568_at		BB041237	Mmp16	55.6913	19.6316	26.7024	21.163	58.0272	48.8866
1440161_at		BB378819	Mmp16	44.8851	22.3559	36.5804	28.2136	22.9061	0.788799
1443412_s_at		BB431535	Mmp16	38.8399	47.9284	19.0749	12.0982	33.8416	2.90874
1448598_at		NM_011846	Mmp17	291.882	136.913	137.657	55.842	194.058	30.1966
1421976_at		AF153199	Mmp19	359.02	183.861	284.501	49.5444	321.879	29.2349
1421977_at		AF153199	Mmp19	27.1358	29.7726	286.747	61.9026	160.093	19.5924
1422175_at		NM_032006	Mmp1a /// LOC672109	91.5503	38.8361	36.935	12.8357	50.5113	20.2955
1422273_at		NM_032007	Mmp1b	32.1818	27.5226	8.56296	7.87768	3.75389	3.64881
1439364_a_at	A3	BF147716	Mmp2	779.078	214.977	2150.68	165.581	7956.47	232.946
1416136_at	A3	NM_008610	Mmp2	648.803	135.308	2437.72	175.954	8888.03	2323.51
1421706_at		NM_013903	Mmp20	126.578	46.1887	26.8688	13.871	16.6027	14.5082
1417282_at	A1	NM_011985	Mmp23	179.012	162.474	906.033	261.418	875.04	130.955
1417281_a_at	A1	NM_011985	Mmp23	134.392	130.974	580.773	318.365	745.667	28.0861
1417678_at		AB021226	Mmp24	89.4797	102.528	165.124	29.8728	72.2833	66.7248
1441456_at		BB335489	Mmp24	139.604	100.166	24.921	14.7491	58.7326	30.6484
1442921_at		AV335829	Mmp24	200.689	150.981	26.8636	21.0285	38.6745	18.2135
1448806_at		AB021226	Mmp24	383.007	133.931	176.648	47.2808	134.924	24.7249
1456376_at		BB314321	Mmp24	14.9183	15.3655	5.58079	4.48298	3.67547	3.32028
1418945_at		NM_010809	Mmp3	258.082	103.435	306.274	94.2653	196.783	25.6531
1449478_at	A1	NM_010810	Mmp7	707.708	404.565	3553.38	1393.55	4138.45	1836.27
1449366_at		NM_008611	Mmp8	398.689	146.975	256.708	61.8868	144.443	51.023
1448291_at	A1	NM_013599	Mmp9	97.5352	93.9658	411.519	42.7567	121.625	24.3657
1416298_at		NM_013599	Mmp9	686.36	80.709	497.489	129.709	396.23	85.7662
1438676_at	A3	BM241485	Mpa2l /// LOC626578 /// LOC673101	48.5007	62.1222	123.325	42.9203	1109.43	1111.77
1447927_at	A3	BG092512	Mpa2l /// LOC626578 /// LOC673101	29.8821	17.8834	197.283	70.5635	1844.31	1220.65
1427076_at	A1	L20315	Mpeg1 /// LOC671359	961.998	614.113	6799.02	333.597	8393.57	463.725
1427076_at	A1	L20315	Mpeg1 /// LOC671359	961.998	614.113	6799.02	333.597	8393.57	463.725
1450430_at	A1	NM_008625	Mrc1	1006.42	560.267	6395.59	1469.52	4037.97	980.422
1450430_at	A1	NM_008625	Mrc1	1006.42	560.267	6395.59	1469.52	4037.97	980.422
1421045_at	A1	BB528408	Mrc2	346.823	179.918	623.149	69.4941	602.896	106.286
1421045_at	A1	BB528408	Mrc2	346.823	179.918	623.149	69.4941	602.896	106.286
1422062_at	A1	BC003814	Msr1	198.251	78.2759	5106.5	1097.55	566.341	391.259
1425434_a_at	A1	L04274	Msr1	80.4443	43.2689	2966.85	1245.58	307.147	165.811
1425435_at	A1	L04274	Msr1	123.008	86.1682	643.039	137.562	134.097	36.2013
1448061_at	A1	AA183642	Msr1	313.51	105.573	4232.85	1302.86	507.007	67.5847
1422062_at	A1	BC003814	Msr1	198.251	78.2759	5106.5	1097.55	566.341	391.259
1425434_a_at	A1	L04274	Msr1	80.4443	43.2689	2966.85	1245.58	307.147	165.811
1425435_at	A1	L04274	Msr1	123.008	86.1682	643.039	137.562	134.097	36.2013
1448061_at	A1	AA183642	Msr1	313.51	105.573	4232.85	1302.86	507.007	67.5847
1448891_at	A1	BC016551	Msr2	354.144	70.306	1802.32	675.182	447.504	104.959
1448891_at	A1	BC016551	Msr2	354.144	70.306	1802.32	675.182	447.504	104.959
1421241_at		BI151406	Ngfr	25.6717	15.4791	11.0648	6.63714	7.06005	5.07534
1450177_at		BI151406	Ngfr	40.3872	15.8836	24.7535	17.592	42.6781	44.6849
1454903_at		BB151515	Ngfr	304.74	157.092	57.3043	55.4654	187.494	56.8939
1428842_a_at	A1	BI407690	Ngfrap1	1205.52	176.681	3075.39	464.915	2543.69	70.5957
1460289_at		NM_008734	Nrg3	63.3023	14.1785	49.5677	7.70446	25.4617	26.481
1421681_at		NM_032002	Nrg4	266.67	104.852	130.457	36.9832	83.5306	45.4936
1422512_a_at	A1	AW476433	Ogfr	512.431	190.75	857.264	147.066	1378.81	623.743
1422511_a_at	A1	AW476433	Ogfr	1627.35	292.434	2122.66	142.973	2839.46	310.791
1424412_at	B1	BE650508	Ogfrl1	730.898	226.677	496.614	202.081	485.268	22.8651
1424413_at		BE650508	Ogfrl1	368.487	127.555	379.392	106.937	379.82	57.5018
1442529_at		BG066785	Ogfrl1	83.804	42.1319	25.9859	1.54849	22.519	2.20021
1424414_at		BE650508	Ogfrl1 /// LOC673882	421.794	79.8631	224.239	14.6665	176.781	26.742
1446023_at		AV024397	Ostf1	88.377	70.8812	55.1248	15.3922	73.9073	32.2771
1452246_at	A1	U58888	Ostf1	771.281	50.0611	2914.31	531.838	1634	507.047
1417190_at	A1	AW989410	Pbef1	520.286	122.369	1368.79	274.843	1878.54	959.588
1449187_at	B1	BB371842	Pdgfa	1721	618.572	1318.7	59.7623	1040.03	433.839
1418711_at	B3	BB371842	Pdgfa	1389.74	553.489	1280.27	446.036	1007.22	618.154
1450414_at	A1	BC023427	Pdgfb	762.13	158.344	2096.58	745.894	869.01	42.3908
1450413_at		BC023427	Pdgfb	202.43	28.807	403.408	48.9267	206.894	43.5712
1419123_a_at	A1	NM_019971	Pdgfc	174.683	32.5965	1106.53	229.734	1844.16	58.4509
1449351_s_at	A3	NM_019971	Pdgfc	942.048	270.818	1186.63	419.378	1904.15	157.018
1446691_at		BB549027	Pdgfd	176.894	198.165	73.2594	56.5602	44.9708	15.535
1456532_at	A3	BB428671	Pdgfd	186.336	40.616	249.067	32.1302	1010.7	193.654
1426319_at	A3	AF335583	Pdgfd	47.6556	37.1349	140.087	11.6949	687.613	69.6316
1421916_at	A1	AW537708	Pdgfra	184.623	81.268	469.084	182.865	641.181	289.751
1438946_at		BB221015	Pdgfra	234.489	95.4778	146.798	60.3479	247.252	23.7143
1421917_at	A1	AW537708	Pdgfra	305.05	128.617	1455.5	472.431	3392.17	270.452
1417148_at		NM_008809	Pdgfrb	27.798	8.9276	278.273	89.9276	364.829	113.643
1436970_a_at	A1	AA499047	Pdgfrb	213.189	77.1642	1285.62	386.996	1079.11	150.268
1428896_at	A1	AK004179	Pdgfrl	204.83	81.6012	653.138	204.531	1146.64	256.496
1418471_at	B1	NM_008827	Pgf	773.88	603.802	43.916	42.9443	68.2832	67.1795
1420464_s_at	A1	NM_011093	Pira1 /// Pira11 /// Pira2 /// Pira3 /// Pira4 /// Pira6 /// Lilrb3 /// LOC619608 /// LOC669449 /// LOC669458 /// LOC675749	193.478	114.437	3221.66	273.317	2324.51	991.624
1434891_at	A1	AV253087	Ptgfrn	818.457	189.598	2826.55	505.302	2761.65	569.553
1439273_at		AV275625	Ripk1	588.266	208.425	519.862	54.9377	636.259	159.16
1450173_at		NM_138952	Ripk2	578.922	148.245	694.385	114.988	705.533	194.919
1418255_s_at	A1	BI662291	Srf	442.578	198.055	533.364	190.083	631.487	106.341
1418256_at	A2	BI662291	Srf	461.269	200.32	517.772	179.447	360.307	13.5755
1450421_at	B1	M92420	Tgfa	554.096	194.823	222.256	64.4012	200.043	44.5305
1421943_at		M92420	Tgfa	379.057	79.5883	400.011	47.8081	384.083	34.8301
1421942_s_at		M92420	Tgfa	791.376	270.934	112.168	28.8623	213.283	42.5656
1445360_at		BF318215	Tgfb1	256.785	110.598	151.999	23.6067	200.814	34.8192
1420653_at	A1	NM_011577	Tgfb1	215.49	154.82	1915.26	565.396	1255.06	505.487
1418136_at	A1	NM_009365	Tgfb1i1	260.515	125.002	739.215	100.125	622.258	26.0109
1423250_a_at		BF144658	Tgfb2	143.249	64.8911	302.247	79.175	418.191	176.526
1438303_at		AV246759	Tgfb2	76.9319	56.1182	65.3252	19.361	97.4471	34.0682
1446141_at		BB296763	Tgfb2	265.092	255.287	17.7762	6.29087	84.3828	75.4303
1450922_a_at		BF144658	Tgfb2	78.3416	41.9321	282.125	46.7514	366.573	70.136
1450923_at		BF144658	Tgfb2	257.153	108.819	242.923	43.5685	429.341	2.14683
1417455_at	A1	BC014690	Tgfb3	266.094	154.945	1196.78	334.78	1805.75	179.81
1415871_at	A1	NM_009369	Tgfbi	98.9201	89.1647	4449.18	917.905	1305.23	29.1461
1448123_s_at	A1	NM_009369	Tgfbi	383.822	217.608	8084.96	1107.13	2034.75	240.588
1456250_x_at	A1	BB533460	Tgfbi	467.903	335.166	5562.59	1198.82	1667.61	179.424
1415871_at	A1	NM_009369	Tgfbi	98.9201	89.1647	4449.18	917.905	1305.23	29.1461
1448123_s_at	A1	NM_009369	Tgfbi	383.822	217.608	8084.96	1107.13	2034.75	240.588
1456250_x_at	A1	BB533460	Tgfbi	467.903	335.166	5562.59	1198.82	1667.61	179.424
1437463_x_at	A1	BB532080	Tgfbi	788.457	308.142	3125.28	886.674	2083.06	114.471
1437463_x_at	A1	BB532080	Tgfbi	788.457	308.142	3125.28	886.674	2083.06	114.471
1420893_a_at	A1	BM248342	Tgfbr1	208.191	15.8797	475.505	305.492	414.712	164.579
1420894_at	A1	BM248342	Tgfbr1	162.486	45.2997	505.042	174.82	348.878	173.271
1446946_at	B1	BM217698	Tgfbr1	409.071	206.196	122.495	100.473	95.5178	60.0631
1420895_at	A1	BM248342	Tgfbr1	1575.96	421.339	4085.35	480.183	3165.96	168.826
1425444_a_at	A1	S69114	Tgfbr2	38.9888	9.47133	794.516	346.452	620.5	403.518
1422019_at		NM_009371	Tgfbr2	115.496	19.1598	29.4557	18.7356	63.3582	12.7773
1443115_at		BB465968	Tgfbr2	110.604	32.9033	50.2424	6.83596	101.514	37.3291
1458607_at		BB201301	Tgfbr2	93.7067	89.5197	16.5959	11.8259	19.7563	18.81
1426397_at	A1	BG793483	Tgfbr2	1038.3	183.819	6138.7	715.167	6264.42	99.295
1433795_at	A1	BM122301	Tgfbr3	1075.51	186.163	1774.43	369.215	2628.21	244.701
1425620_at	A3	AF039601	Tgfbr3	345.464	313.171	322.037	97.7237	431.341	25.194
1440041_at		AV363424	Tgfbr3	130.162	52.6313	46.1184	15.1204	64.8927	7.76006
1442332_at		BG794571	Tgfbr3	99.1057	82.2403	62.7388	56.7288	44.8581	32.0572
1459355_at		BB031396	Tgfbr3	41.9845	16.0977	9.47247	5.10553	14.0833	0.547679
1447314_at		AI480643	Tgfbr3	333.297	141.457	149.339	70.4297	210.44	73.2606
1428425_at		AK014063	Tgfbrap1	344.031	149.236	389.196	134.04	442.16	152.928
1428426_s_at		AK014063	Tgfbrap1	1119.15	126.718	1129.8	79.94	1386.11	85.6756
1422286_a_at	A1	NM_009372	Tgif	241.216	104.939	2298.5	370.365	784.948	31.7365
1431115_at		AK017884	Tgif2	32.1696	6.85495	32.2274	25.7537	71.6588	65.3478
1437241_at	A1	BB137387	Tieg3	429.817	127.259	1376.46	414.443	822.014	49.0871
1449049_at	A1	AF316985	Tlr1	159.319	71.2369	621.071	177.059	591.907	404.214
1437931_at	B1	BB124260	Tlr12	484.264	194.149	152.967	53.5044	194.103	51.7456
1438329_at		BB745017	Tlr12	18.2981	3.14902	4.34343	0.651478	7.27065	0.387325
1457753_at	A1	BI655907	Tlr13	240.471	155.424	1626.84	261.841	747.159	431.267
1419132_at	A1	NM_011905	Tlr2	472.788	85.9919	970.111	155.625	1223.57	272.826
1422781_at	A1	NM_126166	Tlr3	52.294	43.1493	386.875	85.2525	386.847	170.603
1422782_s_at	A3	NM_126166	Tlr3	366.132	158.71	470.46	54.768	738.615	214.89
1418162_at	A1	AF185285	Tlr4	67.5117	56.2899	562.613	137.898	406.344	154.888
1418163_at	A1	AF185285	Tlr4	203.643	132.06	884.138	184.848	653.315	56.9079
1430695_at		AV230010	Tlr4	150.325	79.6804	9.53226	1.85944	24.9622	31.488
1442827_at		BB148728	Tlr4	27.4655	19.0598	234.782	107.415	187.465	226.052
1450242_at	B1	NM_016928	Tlr5	630.287	46.7009	201.56	53.9734	287.578	6.66492
1421352_at		NM_011604	Tlr6	163.101	75.5457	326.808	87.9175	325.388	164.894
1422010_at	A1	AY035889	Tlr7	42.2931	14.5121	615.364	84.8068	1244.34	831.393
1419848_x_at		AI604175	Tlr7	81.9265	52.2391	83.0163	29.468	225.746	82.1323
1449640_at		AI604175	Tlr7	212.935	91.2189	64.1751	12.2105	135.436	36.8827
1450267_at	A1	NM_133212	Tlr8	94.0104	44.0621	393.892	152.055	586.873	334.878
1422083_at	B1	AF348140	Tlr9	499.172	131.929	203.984	40.1297	294.326	55.4456
1419607_at		NM_013693	Tnf	125.413	66.3378	219.348	32.1683	149.451	177.878
1421296_at		NM_020275	Tnfrsf10b	123.191	44.7169	66.7109	30.2453	28.2456	20.9187
1422344_s_at		NM_020294	Tnfrsf10b	98.1813	40.0574	86.5373	24.9442	44.4332	44.9193
1419214_at	B1	BC019185	Tnfrsf11a	980.893	164.202	383.177	58.9403	514.257	242.22
1430259_at		AK020374	Tnfrsf11a	105.062	59.9483	257.882	74.7071	180.514	71.6596
1418309_at		AB013898	Tnfrsf11b	206.607	105.623	98.3744	16.2127	170.106	32.9544
1449033_at		AB013898	Tnfrsf11b	49.3602	44.4177	141.008	87.474	277.845	197.415
1418571_at	A1	NM_013749	Tnfrsf12a	109.484	43.6826	3675.04	957.166	625.897	193.849
1418572_x_at	A1	NM_013749	Tnfrsf12a	360.453	266.198	3464.6	343.88	760.969	90.4109
1423182_at	A1	AK004668	Tnfrsf13b	218.378	80.5674	899.004	107.732	670.409	37.6704
1419307_at		NM_028075	Tnfrsf13c	295.296	66.0099	93.4661	15.8774	138.772	5.06072
1452425_at		BC022125	Tnfrsf14	28.7974	12.3008	52.6135	54.7062	32.3217	18.2252
1420782_at		NM_011608	Tnfrsf17	35.562	24.6042	16.6619	15.1727	105.306	60.6609
1422303_a_at		AF229434	Tnfrsf18	150.088	95.5669	172.072	32.4318	215.071	2.06409
1415921_a_at		NM_013869	Tnfrsf19	147.967	117.703	77.9006	54.9625	305.351	131.782
1425212_a_at		AF167554	Tnfrsf19	140.825	90.017	134.238	17.96	231.888	13.6412
1427600_at		BC025871	Tnfrsf19	83.3159	21.1412	68.0565	12.2121	98.6667	1.47195
1445949_at		BG069486	Tnfrsf19	52.7826	29.2053	20.3713	23.2133	43.2837	16.8929
1455116_at	B1	BB396291	Tnfrsf19l /// LOC671976	1234.82	971.374	381.347	56.9836	368.008	194.939
1417291_at	A1	L26349	Tnfrsf1a	2956.72	833.083	3773.09	430.316	3519.76	450.462
1418099_at	A1	M60469	Tnfrsf1b	258.881	131.852	1012.46	205.07	1495.31	525.457
1448951_at		M60469	Tnfrsf1b	417.659	74.3072	472.331	142.966	510.764	128.06
1422740_at	A1	BG972377	Tnfrsf21	649.688	178.661	794.203	208.509	773.013	167.818
1450731_s_at	A1	BG972377	Tnfrsf21	745.621	190.522	1305.31	58.7903	1089.02	386.794
1426095_a_at	B1	AY046551	Tnfrsf22	575.979	261.288	424.27	108.168	432.867	41.6604
1422038_a_at		NM_023680	Tnfrsf22	26.6926	19.8913	47.7726	30.729	7.10917	1.7264
1422039_at		NM_023680	Tnfrsf22	232.394	84.5692	312.038	157.609	157.976	26.9856
1442590_at	A2	BB366863	Tnfrsf23	241.731	19.9291	678.049	153.547	203.013	39.4169
1422101_at	B3	NM_024290	Tnfrsf23	352.036	226.854	355.638	103.172	241.135	34.3375
1422231_a_at		AF329969	Tnfrsf25	101.792	84.7061	39.0434	24.7572	44.8592	24.8329
1420351_at		NM_011659	Tnfrsf4	465.204	156.852	311.56	3.23009	355.235	76.288
1452389_at		L24495	Tnfrsf7	60.9207	47.2395	31.8617	27.619	59.825	3.1696
1421649_at		NM_009401	Tnfrsf8	95.606	95.6257	101.598	25.5533	100.703	70.9059
1421481_at		NM_011612	Tnfrsf9	291.869	73.6911	99.379	28.3019	127.964	35.1927
1428034_a_at		BC028507	Tnfrsf9	28.49	44.4055	29.4958	43.9009	15.1671	8.99433
1460469_at		BM250782	Tnfrsf9	106.404	25.1988	105.658	73.7408	51.2311	16.2371
1459913_at	A1	AI645293	Tnfsf10	396.415	115.481	712.888	162.026	937.01	447.983
1420412_at		NM_009425	Tnfsf10	192.914	85.5488	209.26	38.7621	248.607	114.075
1439680_at		BB187486	Tnfsf10	308.436	123.104	489.073	62.787	551.899	84.5967
1419083_at		NM_011613	Tnfsf11	63.0293	20.5233	10.5018	12.6714	17.255	17.815
1451944_a_at		AB032771	Tnfsf11	16.7861	4.78963	8.1447	5.08898	8.09782	5.48896
1452440_at	A1	BI730298	Tnfsf12 /// Tnfsf12-tnfsf13	456.51	50.1206	1235.37	238.566	1032.26	139.066
1445227_at		BG069517	Tnfsf13	91.8294	106.1	25.5158	26.8487	51.4656	0.641509
1418345_at	A1	NM_023517	Tnfsf13 /// Tnfsf12-tnfsf13	331.826	126.888	1740.41	269.208	1164.84	19.0435
1445251_at		BB079466	Tnfsf13b	213.247	41.3278	114.33	30.5305	129.952	17.0962
1458047_at		BB667811	Tnfsf13b	16.9726	7.89101	3.73002	1.1083	12.8181	13.2997
1460255_at		NM_033622	Tnfsf13b	222.393	80.893	171.323	49.5635	356.735	72.6327
1421588_at		NM_019418	Tnfsf14	21.9152	5.25958	66.7336	14.7286	14.8841	5.18039
1450298_at		NM_019418	Tnfsf14	49.8433	77.9023	73.74	7.59081	26.4683	8.91819
1421744_at		NM_009452	Tnfsf4	93.9117	101.337	65.7894	29.226	63.4783	23.1868
1444264_at		BE690573	Tnfsf5ip1	240.853	134.112	74.4318	30.3098	97.0468	15.3334
1449926_at		NM_011617	Tnfsf7	201.302	153.727	52.9928	12.0352	40.5379	14.2469
1450272_at		NM_009403	Tnfsf8	56.138	23.4885	97.5915	35.8099	163.652	104.494
1422924_at		NM_009404	Tnfsf9	53.0492	9.66558	167.272	28.0556	148.191	49.0639
1454971_x_at	A1	BB357514	Tsc22d1	6878.1	1642.78	8277.73	931.464	7423.51	59.3169
1451959_a_at		U50279	Vegfa	256.839	117.244	179.969	22.6959	269.754	73.8194
1420909_at	B2	NM_009505	Vegfa	788.848	418.478	487.446	72.6939	787.338	25.5915
1451803_a_at	B2	U48800	Vegfb	749.025	101.76	466.997	120.522	875.822	187.082
1419417_at		NM_009506	Vegfc	92.2055	58.706	147.716	43.3854	174.08	35.8641
1440739_at		AW228853	Vegfc	125.65	83.8916	216.983	17.7596	287.25	107.259
1439766_x_at		BB089170	Vegfc	189.06	44.8646	143.916	14.2328	119.547	2.2151
